# Supplementary material for: Safety of add-on sulfonylurea therapy in patients with type 2 diabetes using metformin: a population-based real-world study
Source: HighWire-hosted journal article supplement (doi:10.1136/bmjdrc-2021-002352), 2021-12-01
Supplement: bmjdrc-2021-002352supp001_data_supplement.pdf [file bmjdrc-2021-002352supp001_data_supplement.pdf]

**Supplementary Table 1: Databases**

| Database                                                                                    | Years                           |
|---------------------------------------------------------------------------------------------|---------------------------------|
| Diabetes Education Resource for Children and Adolescents (DERCA)                            | 1986 to 2015 <sup>†</sup>       |
| Diagnostic Services of Manitoba (DSM)                                                       | 2006 to 2016 <sup>‡</sup>       |
| Drug Program Information Network (DPIN)                                                     | 2002/03 to 2016/17 <sup>†</sup> |
| Emergency Department - Admission, Discharge, and Transfer (ADT) & Information System (EDIS) | 2003 to 2015 <sup>‡</sup>       |
| Hospital Discharge Abstracts (CIHI-DAD)                                                     | 2002/03 to 2016/17 <sup>†</sup> |
| Manitoba Health Insurance Registry                                                          | 2002/03 to 2016/17 <sup>†</sup> |
| Medical Claims (MHSC)                                                                       | 2002/03 to 2016/17 <sup>†</sup> |

<sup>†</sup> Fiscal year: April 1 - March 31.

<sup>‡</sup> Calendar Year: January 1 - December 31.
