# Supplementary material for: Safety of add-on sulfonylurea therapy in patients with type 2 diabetes using metformin: a population-based real-world study
Source: PubMed Central journal article supplement — BMJ Open Diabetes Res Care. 2021 Dec 27;9(2):e002352. doi: 10.1136/bmjdrc-2021-002352 (PMC8718392; doi:10.1136/bmjdrc-2021-002352), 2021-12-27
Supplement: bmjdrc-2021-002352supp002.pdf [file bmjdrc-2021-002352supp002.pdf]

**Supplementary Table 2: Exposures**

| <b>OHA Category</b>             | <b>OHA Name</b>                                                    | <b>ATC Code</b>              |
|---------------------------------|--------------------------------------------------------------------|------------------------------|
| Biguanides<br>(Metformin)       | Metformin                                                          | A10BA                        |
| Sulfonylureas                   | Chlorpropamide, Gliclazide, Glimepiride,<br>Glyburide, Tolbutamide | A10BB                        |
| Metformin + TZD                 | Metformin + Rosiglitazone                                          | A10BD03                      |
| Metformin + DPP4<br>inhibitors  | Metformin + (Linagliptin, Saxagliptin,<br>Sitagliptin)             | A10BD07,<br>A10BD10, A10BD11 |
| Metformin + SGLT2<br>inhibitors | Metformin + Dapagliflozin                                          | A10BD15                      |
| Alpha-glucosidase<br>inhibitors | Acarbose                                                           | A10BF                        |
| TZDs                            | Pioglitazone, Rosiglitazone                                        | A10BG                        |
| DPP4 inhibitors                 | Linagliptin, Saxagliptin, Sitagliptin                              | A10BH                        |
| GLP1 receptor<br>agonists       | Dulaglutide, Exenatide, Liraglutide                                | A10BJ                        |
| SGLT2 inhibitors                | Canagliflozin, Dapagliflozin, Empagliflozin                        | A10BK                        |
| Meglitinides                    | Nateglinide, Repaglinide                                           | A10BX02, A10BX03             |

† ATC - anatomical therapeutic chemical; DPP4 - dipeptidyl peptidase-4; GLP1 - glucagon like peptide-1; OHA - oral antihyperglycemic agent; SGLT2 - sodium-glucose linked transporter-2; TZD - thiazolidinedione.
