# Supplementary material for: Safety of add-on sulfonylurea therapy in patients with type 2 diabetes using metformin: a population-based real-world study
Source: HighWire-hosted journal article supplement (doi:10.1136/bmjdrc-2021-002352), 2021-12-01
Supplement: bmjdrc-2021-002352supp003_data_supplement.pdf [file bmjdrc-2021-002352supp003_data_supplement.pdf]

**Supplementary Table 3: Safety outcomes**

| <b>Outcome</b>           | <b>Case definition</b>                                                                                                                                                                                                                                                                                                                                                                                                                                                                                                                     |
|--------------------------|--------------------------------------------------------------------------------------------------------------------------------------------------------------------------------------------------------------------------------------------------------------------------------------------------------------------------------------------------------------------------------------------------------------------------------------------------------------------------------------------------------------------------------------------|
| All-cause mortality      | <ul style="list-style-type: none"> <li>• Date of death as recorded in the MB Health Insurance Registry.</li> </ul>                                                                                                                                                                                                                                                                                                                                                                                                                         |
| Cardiovascular event     |                                                                                                                                                                                                                                                                                                                                                                                                                                                                                                                                            |
| <i>Acute MI</i>          | <ul style="list-style-type: none"> <li>• Date of hospitalization where the reason code for the main diagnosis has a prefix of 410 (ICD-9) or I21 (ICD-10).</li> </ul>                                                                                                                                                                                                                                                                                                                                                                      |
| <i>Heart Failure</i>     | <ul style="list-style-type: none"> <li>• Date of hospitalization where the reason code for the main diagnosis has a prefix of 428 (ICD-9) or I50 (ICD-10).</li> </ul>                                                                                                                                                                                                                                                                                                                                                                      |
| <i>Stroke</i>            | <ul style="list-style-type: none"> <li>• Date of hospitalization where the reason code for the main diagnosis has a prefix of 430, 431, 432, 433, 434, 436 (ICD-9) or I60, I61, I62, I63 or I64 (ICD-10).</li> </ul>                                                                                                                                                                                                                                                                                                                       |
| <i>Unstable Angina</i>   | <ul style="list-style-type: none"> <li>• Date of hospitalization where the reason code for the main diagnosis has a prefix of 411 (ICD-9) or I20.0 (ICD-10).</li> </ul>                                                                                                                                                                                                                                                                                                                                                                    |
| Major hypoglycemic event | <ul style="list-style-type: none"> <li>• First of the following occurrences:             <ul style="list-style-type: none"> <li>○ Date of hospitalization where the reason code for any diagnosis has a prefix of 251.0, 251.1, 251.2 (ICD-9) or E11.63, E13.63, E14.63, E15, E16.0, E16.1 or E16.2 (ICD-10) <b>or</b></li> <li>○ Date of Emergency Department visit where the reason for the visit is coded as “Hypoglycemia” <b>or</b></li> <li>○ Date of laboratory test where blood glucose is &lt; 3.5 mmol/L.</li> </ul> </li> </ul> |

† ICD - international classification of diseases; MB - Manitoba; MI - myocardial infarction.
