# Supplementary material for: Safety of add-on sulfonylurea therapy in patients with type 2 diabetes using metformin: a population-based real-world study
Source: PubMed Central journal article supplement — BMJ Open Diabetes Res Care. 2021 Dec 27;9(2):e002352. doi: 10.1136/bmjdrc-2021-002352 (PMC8718392; doi:10.1136/bmjdrc-2021-002352), 2021-12-27
Supplement: bmjdrc-2021-002352supp004.pdf [file bmjdrc-2021-002352supp004.pdf]

**Supplementary Table 4: Baseline comorbidities**

| Hospital/Physician Claims     | ICD-9 Codes                                                                                                                                             | ICD-10 Codes                                                                                                                                     |
|-------------------------------|---------------------------------------------------------------------------------------------------------------------------------------------------------|--------------------------------------------------------------------------------------------------------------------------------------------------|
| Alcohol use                   | 291, 303, 305.0, 357.5, 425.5, 535.3, 571.0-571.3, 780.0, 977.3, V11.3                                                                                  | F10, K70, X45, X65, Y15, Y90-Y91                                                                                                                 |
| Amputation of lower extremity | 84.1                                                                                                                                                    | 1VC.91, 1VC.93, 1VG.93, 1VQ93, 1WA.93, 1WE.93, 1WJ.93, 1WL.93                                                                                    |
| Asthma                        | 493                                                                                                                                                     | J45                                                                                                                                              |
| Cancer                        | 140-172, 174-209.3, 209.7                                                                                                                               | C00 – C99                                                                                                                                        |
| Cardiovascular disease        | 402.01, 402.11, 402.91, 410, 411, 413, 414.0, 420-434, 436, 440, 441, 444, V12.5<br>00.61, 00.63, 00.66, 17.55, 36.06, 36.07, 36.1, 38.11, 38.12, 39.28 | G45, I20.0, I20.1, I20.8, I20.9, I21-I23, I25.1, I25.2, I50-I51, I60-I64, I70-I79, Z95<br>I1J.50, I1J.57, I1J.76, I1E.50, I1E.51, I1E.57, I1E.76 |
| CKD                           | 585, 586                                                                                                                                                | N18-N19                                                                                                                                          |
| COPD                          | 491, 492, 496                                                                                                                                           | J41-J44                                                                                                                                          |
| Dementia                      | 290.0, 290.1, 290.2, 290.3, 290.4, 290.8, 290.9, 291.2, 292.82, 294.0, 294.1, 294.2, 294.8, 331.0, 331.1, 331.2, 331.7, 331.8, 331.9, 797               | F00-F03, F05.1, G30, G31.1                                                                                                                       |
| HIV/AIDS                      | 042, 043, 044, 795.71, V08, 079.53                                                                                                                      | B20-24, B97.35, R75, Z21                                                                                                                         |
| Hyperlipidemia                | 272.0-272.2, 272.4                                                                                                                                      | E78.0-E78.2, E78.4-E78.5                                                                                                                         |
| Hypertension                  | 401, 402.00, 402.1, 402.10, 402.90, 403-405                                                                                                             | I10-I13, I15                                                                                                                                     |
| Liver disease                 | 570-573                                                                                                                                                 | K70-K77                                                                                                                                          |
| Microvascular disease         | 250.40, 250.43, 250.50, 250.52, 250.60, 250.62, 250.70, 250.72, 337.0, 337.1, 354, 355, 362, 583.81, 681.1, 6826.6, 682.7, 682.9                        | E11.2-E11.4, E11.7, E13.2-13.4, E13.7, E14.2-E14.4, E14.7, G57, G59.0 G63.2, G99.0, H35.0-HE35.2, H36.0, N08.3                                   |
| Obesity                       | 278.0, 793.91, V85.3, V85.4, 783.1                                                                                                                      | E66.01, E66.2, E66.3, E66.9                                                                                                                      |

† CKD – chronic kidney disease; COPD - chronic obstructive pulmonary disease; HIV/AIDS - human immunodeficiency virus infection and acquired immune deficiency syndrome; ICD - international classification of diseases; PVD - peripheral vascular disease
