# Supplementary material for: Safety of add-on sulfonylurea therapy in patients with type 2 diabetes using metformin: a population-based real-world study
Source: PubMed Central journal article supplement — BMJ Open Diabetes Res Care. 2021 Dec 27;9(2):e002352. doi: 10.1136/bmjdrc-2021-002352 (PMC8718392; doi:10.1136/bmjdrc-2021-002352), 2021-12-27
Supplement: bmjdrc-2021-002352supp005.pdf [file bmjdrc-2021-002352supp005.pdf]

**Supplementary Table 5: Baseline medications**

| <b>Medication Class</b>          | <b>ATC Code</b>                  |
|----------------------------------|----------------------------------|
| ACE inhibitors                   | C09A, C09B                       |
| Anticoagulants                   | B01AA01, B01AA03, B01AE07, B01AF |
| Anti-platelets                   | B01AC                            |
| ARBs                             | C09C, C09D (excluding C09DX04)   |
| Beta-blockers                    | C07                              |
| CCBs                             | C08                              |
| Digoxin                          | C01AA05                          |
| Direct Vasodilators              | C02D                             |
| Loop diuretics                   | C03C                             |
| Potassium sparing diuretics      | C03D                             |
| Thiazide diuretics               | C03A                             |
| Statins                          | C10AA                            |
| Other lipid lowering medications | C10 (excluding C10AA)            |

† ACE - Angiotensin-converting enzyme; ARB - Angiotensin II receptor blocker; ATC - anatomical therapeutic chemical; CCB - calcium channel blocker.
