# Supplementary material for: Safety of add-on sulfonylurea therapy in patients with type 2 diabetes using metformin: a population-based real-world study
Source: PubMed Central journal article supplement — BMJ Open Diabetes Res Care. 2021 Dec 27;9(2):e002352. doi: 10.1136/bmjdrc-2021-002352 (PMC8718392; doi:10.1136/bmjdrc-2021-002352), 2021-12-27
Supplement: bmjdrc-2021-002352supp006.pdf [file bmjdrc-2021-002352supp006.pdf]

**Supplementary Table 6: Post-match baseline characteristics by combotherapy group**

| Characteristic                         | Sulfonylurea<br>(n = 4,498) | ‘Other’<br>(n = 4,498) | SMD   |
|----------------------------------------|-----------------------------|------------------------|-------|
| <b>Demographics</b>                    |                             |                        |       |
| Age (years)                            | 56.7 ± 13.6                 | 56.3 ± 12.6            | 0.031 |
| Sex (% female)                         | 1,984 (44.1%)               | 2,010 (44.7%)          | 0.012 |
| <b>Geographic/Socioeconomic Status</b> |                             |                        |       |
| Rural/Income Quintile 1                | 282 (6.3%)                  | 275 (6.1%)             | 0.007 |
| Rural/Income Quintile 2                | 284 (6.3%)                  | 279 (6.2%)             | 0.005 |
| Rural/Income Quintile 3                | 311 (6.9%)                  | 287 (6.4%)             | 0.021 |
| Rural/Income Quintile 4                | 298 (6.6%)                  | 313 (7.0%)             | 0.013 |
| Rural/Income Quintile 5                | 332 (7.4%)                  | 328 (7.3%)             | 0.003 |
| Urban/Income Quintile 1                | 496 (11.0%)                 | 508 (11.3%)            | 0.008 |
| Urban/Income Quintile 2                | 620 (13.8%)                 | 625 (13.9%)            | 0.003 |
| Urban/Income Quintile 3                | 619 (13.8%)                 | 611 (13.6%)            | 0.005 |
| Urban/Income Quintile 4                | 619 (13.8%)                 | 643 (14.3%)            | 0.015 |
| Urban/Income Quintile 5                | 608 (13.5%)                 | 606 (13.5%)            | 0.001 |
| Unknown                                | 29 (0.5%)                   | 23 (0.5%)              | 0.018 |
| <b>Baseline Comorbidities</b>          |                             |                        |       |
| Alcohol abuse                          | 82 (1.8%)                   | 75 (1.7%)              | 0.012 |
| Amputation                             | 10 (0.2%)                   | 9 (0.2%)               | 0.005 |
| Asthma                                 | 690 (15.3%)                 | 694 (15.4%)            | 0.002 |
| CKD                                    | 100 (2.2%)                  | 107 (2.4%)             | 0.010 |
| COPD                                   | 366 (8.1%)                  | 382 (8.5%)             | 0.013 |
| Cardiovascular disease                 | 1,090 (24.2%)               | 1,066 (23.7%)          | 0.012 |
| Dementia                               | 110 (2.4%)                  | 92 (2.0%)              | 0.027 |
| Hypertension                           | 3,011 (66.9%)               | 3,005 (66.8%)          | 0.003 |
| Hyperlipidemia                         | 1,725 (38.4%)               | 1,768 (39.3%)          | 0.013 |
| Liver disease                          | 278 (6.2%)                  | 284 (6.3%)             | 0.006 |
| Malignancy                             | 494 (11.0%)                 | 453 (10.1%)            | 0.030 |
| Microvascular disease                  | 986 (21.7%)                 | 996 (22.2%)            | 0.005 |
| Obesity                                | 350 (7.8%)                  | 364 (8.1%)             | 0.012 |
| <b>Baseline Medication Use</b>         |                             |                        |       |
| ACE inhibitors                         | 1,756 (39.0%)               | 1,753 (39.0%)          | 0.001 |
| Anticoagulants                         | 156 (3.5%)                  | 173 (3.8%)             | 0.020 |
| Anti-platelets                         | 676 (15.0%)                 | 661 (14.7%)            | 0.009 |
| ARBs                                   | 1,121 (23.5%)               | 1,084 (24.1%)          | 0.019 |
| Beta blockers                          | 894 (19.9%)                 | 902 (20.1%)            | 0.004 |
| CCBs                                   | 858 (19.1%)                 | 881 (19.6%)            | 0.013 |
| Digoxin                                | 76 (1.7%)                   | 77 (1.7%)              | 0.002 |
| Direct Vasodilators                    | 9 (0.2%)                    | 9 (0.2%)               | 0.000 |
| Loop diuretics                         | 319 (7.1%)                  | 307 (6.8%)             | 0.010 |
| Potassium sparing diuretics            | 79 (1.8%)                   | 76 (1.7%)              | 0.005 |
| Thiazide diuretics                     | 599 (13.3%)                 | 615 (13.7%)            | 0.010 |
| Statins                                | 2,407 (53.5%)               | 2,431 (54.0%)          | 0.011 |
| Other lipid lowering medications       | 340 (7.6%)                  | 335 (7.4%)             | 0.004 |

| <b>Index Fiscal Year</b>                       |               |               |        |
|------------------------------------------------|---------------|---------------|--------|
| 2006/07                                        | 581 (12.9%)   | 584 (13.0%)   | 0.002  |
| 2007/08                                        | 395 (8.8%)    | 375 (8.3%)    | 0.016  |
| 2008/09                                        | 259 (5.8%)    | 263 (5.8%)    | 0.004  |
| 2009/10                                        | 312 (6.9%)    | 295 (6.6%)    | 0.015  |
| 2010/11                                        | 227 (5.0%)    | 247 (5.5%)    | 0.020  |
| 2011/12                                        | 245(5.4%)     | 253 (5.6%)    | 0.008  |
| 2012/13                                        | 283 (6.3%)    | 297 (6.6%)    | 0.013  |
| 2013/14                                        | 258 (5.7%)    | 271 (6.0%)    | 0.012  |
| 2014/15                                        | 462 (10.3%)   | 468 (10.4%)   | 0.004  |
| 2015/16                                        | 857 (19.1%)   | 852 (18.9%)   | 0.003  |
| 2016/17                                        | 619 (13.8%)   | 593 (13.2%)   | 0.017  |
| <b>Time on metformin before add-on therapy</b> |               |               |        |
| ≥ 3 years                                      | 1,314 (29.2%) | 1,339 (29.8%) | 0.012  |
| 1 - 3 years                                    | 1,168 (26.0%) | 1,145 (25.5%) | 0.012  |
| < 1 year                                       | 2,016 (44.8%) | 2,014 (44.8%) | <0.001 |

† ACE - Angiotensin-converting enzyme; ARB - Angiotensin II receptor blocker; CCB - calcium channel blocker; COPD - chronic obstructive pulmonary disease; PVD - peripheral vascular disease; SMD - standardized mean difference.
